# Supplementary material for: Protocol for a multinational risk-stratified randomised controlled trial in paediatric Crohn’s disease: methotrexate versus azathioprine or adalimumab for maintaining remission in patients at low or high risk for aggressive disease course
Source: PubMed Central journal article supplement (PMC7332179; doi:10.1136/bmjopen-2019-034892), 2020-07-01
Supplement: bmjopen-2019-034892supp002.pdf [file bmjopen-2019-034892supp002.pdf]

| <b>Participating Sites – REDUCE-RISK in CD Study</b> |             |                                            |                                                                                                                                                                                                                                   |
|------------------------------------------------------|-------------|--------------------------------------------|-----------------------------------------------------------------------------------------------------------------------------------------------------------------------------------------------------------------------------------|
| <b>Country</b>                                       | <b>City</b> | <b>Site</b>                                | <b>Ethics committee</b>                                                                                                                                                                                                           |
| <b>Belgium</b>                                       | Brussels    | Universitair Ziekenhuis                    | Commissie Ethiek, UZ <b>Brussel</b>                                                                                                                                                                                               |
|                                                      | Brussels    | Clinique Saint Luc UCL                     |                                                                                                                                                                                                                                   |
|                                                      | Liège       | Clinique de l'Espérance                    |                                                                                                                                                                                                                                   |
|                                                      | Brussels    | HUDERF                                     |                                                                                                                                                                                                                                   |
| <b>Canada</b>                                        | Toronto     | SickKids                                   | SickKids Research Ethics Board, <b>Toronto</b>                                                                                                                                                                                    |
| <b>Czech Republic</b>                                | Prague      | FN Motol                                   | Eticka Komise, <b>Plzen</b><br>Eticka Komise, VFN <b>Praha</b><br>Eticka Komise, FN Motol<br><b>Praha</b>                                                                                                                         |
|                                                      | Plzeň       | FN Plzeň                                   |                                                                                                                                                                                                                                   |
|                                                      | Prague      | First Medical Faculty                      |                                                                                                                                                                                                                                   |
| <b>France</b>                                        | Paris       | Hôpital Necker Enfants Malades             | CPP Hôpital Necker, <b>Paris</b>                                                                                                                                                                                                  |
|                                                      | Paris       | Hôpital Robert Debré                       |                                                                                                                                                                                                                                   |
|                                                      | Paris       | Hôpital Armand Trousseau                   |                                                                                                                                                                                                                                   |
|                                                      | Le Havre    | Hôpital Jacques Monod                      |                                                                                                                                                                                                                                   |
|                                                      | Nancy       | Hôpitaux de Brabois                        |                                                                                                                                                                                                                                   |
|                                                      | Toulouse    | Hôpital des Enfants                        |                                                                                                                                                                                                                                   |
|                                                      | Tours       | Hôpital Clocheville                        |                                                                                                                                                                                                                                   |
|                                                      | Caen        | CHU Caen Côte de Nacre                     |                                                                                                                                                                                                                                   |
|                                                      | Marseille   | Hôpital de la Timone                       |                                                                                                                                                                                                                                   |
| <b>Germany</b>                                       | Munich      | Childrens Hospital                         | Ethikkommission LMU, <b>München</b>                                                                                                                                                                                               |
|                                                      | Ulm         | Universitätsklinikum                       |                                                                                                                                                                                                                                   |
|                                                      | Hannover    | MHH Kinderklinik                           |                                                                                                                                                                                                                                   |
|                                                      | Giessen     | UKGM                                       |                                                                                                                                                                                                                                   |
|                                                      | Berlin      | Charite Hospital                           |                                                                                                                                                                                                                                   |
| <b>Greece</b>                                        | Athens      | Children's Hospital "AGIA SOFIA"           | Ethics Committee, <b>Athens</b>                                                                                                                                                                                                   |
| <b>Israel</b>                                        | Jerusalem   | Shaare Zedek Medical Center                | Helsinki Committee,<br>Schneider Medical Center,<br><b>Petah Tikva</b><br>Ethics and Research<br>Committee, Wolfson Medical<br>Center, <b>Tel Aviv</b><br>Institutional Review Board,<br>SZMC, <b>Jerusalem</b>                   |
|                                                      | Tel Aviv    | Wolfson Medical Center                     |                                                                                                                                                                                                                                   |
|                                                      | Petah Tikva | Schneider Children's Medical Center        |                                                                                                                                                                                                                                   |
|                                                      | Ramat Gan   | Sheba Medical Center                       |                                                                                                                                                                                                                                   |
|                                                      | Haifa       | Rambam Medical Center                      |                                                                                                                                                                                                                                   |
| <b>Italy</b>                                         | Rome        | Università degli Studi di Roma La Sapienza | Comitato Etico dell'Università "SAPIENZA", <b>Roma</b><br>Comitato Etico Regionale per la Sperimentazione Clinica della Regione Toscana<br>Sezione, <b>Firenze</b><br>Comitato Etico, Servizio Santario Regionale, <b>Bologna</b> |
|                                                      | Bologna     | Maggiore Hospital                          |                                                                                                                                                                                                                                   |
|                                                      | Florence    | Azienda Ospedaliero Universitaria          |                                                                                                                                                                                                                                   |
|                                                      | Parma       | Azienda Ospedaliero                        |                                                                                                                                                                                                                                   |
|                                                      | Rome        | Opsedale Pediatrico Bambino Gesù           |                                                                                                                                                                                                                                   |
| <b>Netherlands</b>                                   | Rotterdam   | Erasmus Medical Center                     | Medische Etische Toetsings Commissie, Erasmus MC,                                                                                                                                                                                 |

|                       |            |                                                          |                                                                                      |
|-----------------------|------------|----------------------------------------------------------|--------------------------------------------------------------------------------------|
|                       |            |                                                          | <b>Rotterdam</b>                                                                     |
| <b>Poland</b>         | Warsaw     | Centrum Zdrowia MDM                                      | Bioethical Commission at the Institute of Polish Mother's Health Center, <b>Lodz</b> |
|                       | Białystok  | Uniwersytecki Dziecięcy Szpital Kliniczny                |                                                                                      |
|                       | Łódź       | Instytut Centrum Zdrowia Matki Polki                     |                                                                                      |
| <b>United Kingdom</b> | Glasgow    | The Royal Hospital for Children                          | North West - Liverpool East Research Ethics Committee, NHS, <b>Manchester</b>        |
|                       | London     | Royal London Children's Hospital, Barts Health NHS Trust |                                                                                      |
|                       | Edinburgh  | Sick Children's Hospital                                 |                                                                                      |
|                       | Birmingham | Children's Hospital                                      |                                                                                      |
|                       | Oxford     | John Radcliffe Hospital                                  |                                                                                      |

*Supplementary Table 1 – Sites participating in REDUCE-RISK in CD*
